# Supplementary material for: Associations between domains of physical activity, sitting time, and different measures of overweight and obesity
Source: PubMed Central journal article supplement — Prev Med Rep. 2016 Jan 29;3:177–84. doi: 10.1016/j.pmedr.2016.01.007 (PMC4929209; doi:10.1016/j.pmedr.2016.01.007), 2016-01-29
Supplement: mmc1.pdf [file mmc1.pdf]

**Supplementary Material Table 1.** Summary of measures of overweight/obesity and physical activity in SAP 2 and SAP 3 used in the present analyses

| Variable                                                | measured/<br>self-<br>report | Available for | Description                                                                                                                                                                                                                                                                                                                                                                                                                                                                                                                                                                                                                                                                                                                                          |
|---------------------------------------------------------|------------------------------|---------------|------------------------------------------------------------------------------------------------------------------------------------------------------------------------------------------------------------------------------------------------------------------------------------------------------------------------------------------------------------------------------------------------------------------------------------------------------------------------------------------------------------------------------------------------------------------------------------------------------------------------------------------------------------------------------------------------------------------------------------------------------|
| <i>Overweight/obesity</i>                               |                              |               |                                                                                                                                                                                                                                                                                                                                                                                                                                                                                                                                                                                                                                                                                                                                                      |
| Height                                                  | measured                     | SAP 2 + 3     | measured without shoes in light clothing                                                                                                                                                                                                                                                                                                                                                                                                                                                                                                                                                                                                                                                                                                             |
| Weight                                                  | measured                     | SAP 2 + 3     | measured without shoes in light clothing                                                                                                                                                                                                                                                                                                                                                                                                                                                                                                                                                                                                                                                                                                             |
| Waist circumference                                     | measured                     | SAP 3         | measured in relaxed standing position using a SECA 201 measuring tape (SECA GmbH&Co, Hamburg, Germany)                                                                                                                                                                                                                                                                                                                                                                                                                                                                                                                                                                                                                                               |
| Hip circumference                                       | measured                     | SAP 3         | measured in relaxed standing position using a SECA 201 measuring tape (SECA GmbH&Co, Hamburg, Germany)                                                                                                                                                                                                                                                                                                                                                                                                                                                                                                                                                                                                                                               |
| Percent body fat                                        | measured                     | SAP 3         | measured with bioelectrical impedance analyses (BIA) using the device Helios (Helios, Forana, Frankfurt, Germany)                                                                                                                                                                                                                                                                                                                                                                                                                                                                                                                                                                                                                                    |
| <i>Physical activity</i>                                |                              |               |                                                                                                                                                                                                                                                                                                                                                                                                                                                                                                                                                                                                                                                                                                                                                      |
| Long IPAQ                                               | self-<br>report              | SAP 3         | Long International Physical Activity Questionnaire used in a written, self-administered format. For questionnaire see <a href="https://sites.google.com/site/theipaq">https://sites.google.com/site/theipaq</a>                                                                                                                                                                                                                                                                                                                                                                                                                                                                                                                                      |
| 4 questions for moderate and vigorous physical activity | self-<br>report              | SAP 2 + 3     | Think about physical activities that make you breathe at least a bit harder than normal, such as brisk walking, hiking, dancing, yard work or several sport activities.<br>1) On how many days a week do you engage in such activities? (⇒days/week)<br>2) How long on average are you active on one of these days? (⇒minutes)<br>3) How often do you engage in physical activities that get you out of breath or make you sweat? (⇒daily, 4-6 times per week, 2-3 times per week, once a week, once a month, less than once a month, never)<br>4) How many hours per week do you engage in physical activities that get you out of breath or make you sweat? (⇒not at all, about half an hour, about 1 hour, 2-3 hours, 4-6 hours, 7 or more hours) |

Abbreviations: IPAQ, International Physical Activity Questionnaire; SAP, SAPALDIA (Swiss Cohort Study on Air Pollution and Lung and Heart Disease in Adults)
