# Supplementary material for: Associations between domains of physical activity, sitting time, and different measures of overweight and obesity
Source: PubMed Central journal article supplement — Prev Med Rep. 2016 Jan 29;3:177–84. doi: 10.1016/j.pmedr.2016.01.007 (PMC4929209; doi:10.1016/j.pmedr.2016.01.007), 2016-01-29
Supplement: mmc2.pdf [file mmc2.pdf]

**Supplementary Material Table 2.** Characteristics of study population in 2002/03 (SAP 2)

|                                                   | Total |          |        | Men  |          |        | Women |          |        |
|---------------------------------------------------|-------|----------|--------|------|----------|--------|-------|----------|--------|
|                                                   | N     | mean / % | SD     | N    | mean / % | SD     | N     | mean / % | SD     |
| <i>Socio-demographic variables</i>                |       |          |        |      |          |        |       |          |        |
| Age, years                                        | 4488  | 51.3     | 11.1   | 2224 | 51.0     | 11.2   | 2264  | 51.6     | 11.0   |
| Sex                                               | 4488  |          |        |      |          |        |       |          |        |
| men                                               |       | 49.6     |        |      |          |        |       |          |        |
| women                                             |       | 50.4     |        |      |          |        |       |          |        |
| Nationality                                       | 4484  |          |        | 2223 |          |        | 2261  |          |        |
| Swiss                                             |       | 88.3     |        |      | 87.4     |        |       | 89.3     |        |
| Non-Swiss                                         |       | 11.7     |        |      | 12.6     |        |       | 10.7     |        |
| Language region                                   | 4398  |          |        | 2191 |          |        | 2207  |          |        |
| German                                            |       | 54.8     |        |      | 56.2     |        |       | 53.5     |        |
| French                                            |       | 31.6     |        |      | 31.6     |        |       | 31.5     |        |
| Italian                                           |       | 13.6     |        |      | 12.2     |        |       | 15.0     |        |
| Education                                         | 4485  |          |        | 2223 |          |        | 2262  |          |        |
| lower than tertiary education                     |       | 73.0     |        |      | 64.2     |        |       | 81.7     |        |
| tertiary education                                |       | 27.0     |        |      | 35.8     |        |       | 18.3     |        |
| <i>Health-related variables</i>                   |       |          |        |      |          |        |       |          |        |
| BMI, kg/m <sup>2</sup>                            | 4477  | 25.7     | 4.2    | 2220 | 26.4     | 3.6    | 2257  | 24.9     | 4.6    |
| BMI category                                      | 4477  |          |        | 2220 |          |        | 2257  |          |        |
| normal weight                                     |       | 48.4     |        |      | 37.6     |        |       | 59.0     |        |
| overweight                                        |       | 37.2     |        |      | 47.2     |        |       | 27.4     |        |
| with obesity                                      |       | 14.4     |        |      | 15.2     |        |       | 13.6     |        |
| Health status                                     | 3899  |          |        | 1949 |          |        | 1950  |          |        |
| not so good or bad                                |       | 4.6      |        |      | 3.7      |        |       | 5.4      |        |
| good                                              |       | 44.0     |        |      | 41.7     |        |       | 46.4     |        |
| excellent or very good                            |       | 51.4     |        |      | 54.6     |        |       | 48.2     |        |
| Smoking status                                    | 4488  |          |        | 2224 |          |        | 2264  |          |        |
| current non-smoker                                |       | 77.8     |        |      | 75.9     |        |       | 79.7     |        |
| current smoker                                    |       | 22.2     |        |      | 24.1     |        |       | 20.3     |        |
| Alcohol intake                                    | 4484  |          |        | 2221 |          |        | 2263  |          |        |
| 1 or 2 times a week or less                       |       | 60.6     |        |      | 47.4     |        |       | 73.6     |        |
| several times a week or daily                     |       | 39.4     |        |      | 52.6     |        |       | 26.4     |        |
| <i>Physical activity</i>                          |       |          |        |      |          |        |       |          |        |
| PA according to short questionnaire, MET-min/week | 4482  | 1187.5   | 1161.8 | 2222 | 1308.0   | 1237.6 | 2260  | 1069.0   | 1069.2 |
