# Supplementary material for: Associations between domains of physical activity, sitting time, and different measures of overweight and obesity
Source: PubMed Central journal article supplement — Prev Med Rep. 2016 Jan 29;3:177–84. doi: 10.1016/j.pmedr.2016.01.007 (PMC4929209; doi:10.1016/j.pmedr.2016.01.007), 2016-01-29
Supplement: mmc3.pdf [file mmc3.pdf]

**Supplementary Material Table 3.** Cross-sectional associations between domains of physical activity, sitting time and different measures of overweight/obesity

|                                  |        | cut points   | BMI 25-29.99 |                  | BMI ≥30     |                  | WC 94-101.9 / 80-87.9 |           | WC ≥102 / ≥88 |                  | WHR 0.9-0.99 / 0.8-0.84 |           | WHR ≥1.0 / ≥0.85 |                  | WHtR 0.5-0.59 |                  | WHtR ≥0.6   |                  | BIA % body fat >25% / >32% |                  |  |
|----------------------------------|--------|--------------|--------------|------------------|-------------|------------------|-----------------------|-----------|---------------|------------------|-------------------------|-----------|------------------|------------------|---------------|------------------|-------------|------------------|----------------------------|------------------|--|
|                                  |        |              | OR           | 95% CI           | OR          | 95% CI           | OR                    | 95% CI    | OR            | 95% CI           | OR                      | 95% CI    | OR               | 95% CI           | OR            | 95% CI           | OR          | 95% CI           | OR                         | 95% CI           |  |
| <b>IPAQ</b>                      |        |              |              |                  |             |                  |                       |           |               |                  |                         |           |                  |                  |               |                  |             |                  |                            |                  |  |
| Total PA (MET-min/week)          | low    | <2528        | 1.00         |                  | 1.00        |                  | 1.00                  |           | 1.00          |                  | 1.00                    |           | 1.00             |                  | 1.00          |                  | 1.00        |                  | 1.00                       |                  |  |
|                                  | medium | 2528 to 5910 | <b>0.81</b>  | <b>0.65-1.00</b> | <b>0.65</b> | <b>0.50-0.86</b> | 0.83                  | 0.65-1.06 | <b>0.74</b>   | <b>0.60-0.93</b> | 1.12                    | 0.88-1.43 | 0.92             | 0.71-1.19        | 0.80          | 0.64-1.01        | <b>0.64</b> | <b>0.47-0.88</b> | <b>0.63</b>                | <b>0.51-0.78</b> |  |
|                                  | high   | >5910        | 0.93         | 0.75-1.16        | <b>0.71</b> | <b>0.54-0.94</b> | 0.84                  | 0.65-1.07 | <b>0.65</b>   | <b>0.51-0.81</b> | 1.09                    | 0.84-1.40 | 0.92             | 0.71-1.20        | 0.86          | 0.68-1.08        | <b>0.67</b> | <b>0.49-0.92</b> | <b>0.60</b>                | <b>0.48-0.74</b> |  |
| PA at work (MET-min/week)        | low    | 0            | 1.00         |                  | 1.00        |                  | 1.00                  |           | 1.00          |                  | 1.00                    |           | 1.00             |                  | 1.00          |                  | 1.00        |                  | 1.00                       |                  |  |
|                                  | high   | >0           | 0.90         | 0.74-1.09        | 1.04        | 0.80-1.34        | 1.01                  | 0.81-1.26 | 0.99          | 0.80-1.22        | 1.13                    | 0.91-1.41 | 1.16             | 0.91-1.47        | 0.98          | 0.80-1.21        | 0.96        | 0.72-1.28        | 0.99                       | 0.82-1.19        |  |
| Transport PA (MET-min/week)      | low    | <235         | 1.00         |                  | 1.00        |                  | 1.00                  |           | 1.00          |                  | 1.00                    |           | 1.00             |                  | 1.00          |                  | 1.00        |                  | 1.00                       |                  |  |
|                                  | medium | 235 to 990   | 0.84         | 0.67-1.04        | 0.92        | 0.69-1.21        | 1.08                  | 0.85-1.38 | 0.94          | 0.74-1.18        | 0.87                    | 0.68-1.11 | <b>0.75</b>      | <b>0.57-0.97</b> | 1.04          | 0.83-1.31        | 0.91        | 0.66-1.24        | 0.92                       | 0.75-1.14        |  |
|                                  | high   | >990         | 0.87         | 0.70-1.09        | <b>0.65</b> | <b>0.49-0.88</b> | 0.88                  | 0.68-1.13 | <b>0.76</b>   | <b>0.60-0.97</b> | 0.86                    | 0.67-1.12 | <b>0.65</b>      | <b>0.49-0.87</b> | 0.96          | 0.75-1.21        | <b>0.67</b> | <b>0.48-0.94</b> | 0.83                       | 0.67-1.04        |  |
| Domestic PA (MET-min/week)       | low    | <425         | 1.00         |                  | 1.00        |                  | 1.00                  |           | 1.00          |                  | 1.00                    |           | 1.00             |                  | 1.00          |                  | 1.00        |                  | 1.00                       |                  |  |
|                                  | medium | 425 to 1740  | 0.90         | 0.73-1.12        | 1.03        | 0.78-1.37        | 1.12                  | 0.88-1.43 | 0.91          | 0.73-1.15        | 1.14                    | 0.89-1.45 | 1.08             | 0.82-1.41        | 1.05          | 0.83-1.31        | 0.86        | 0.62-1.18        | 0.95                       | 0.77-1.18        |  |
|                                  | high   | >1740        | 1.09         | 0.87-1.37        | 1.04        | 0.78-1.39        | 1.22                  | 0.95-1.58 | 1.03          | 0.81-1.31        | 1.16                    | 0.89-1.50 | 1.16             | 0.88-1.53        | 1.26          | 0.98-1.60        | 1.15        | 0.83-1.59        | 0.86                       | 0.69-1.07        |  |
| Leisure-time PA (MET-min/week)   | low    | <460         | 1.00         |                  | 1.00        |                  | 1.00                  |           | 1.00          |                  | 1.00                    |           | 1.00             |                  | 1.00          |                  | 1.00        |                  | 1.00                       |                  |  |
|                                  | medium | 460 to 1515  | 0.82         | 0.66-1.02        | <b>0.69</b> | <b>0.52-0.91</b> | 0.83                  | 0.65-1.06 | <b>0.68</b>   | <b>0.54-0.86</b> | 0.89                    | 0.69-1.14 | <b>0.65</b>      | <b>0.50-0.85</b> | <b>0.78</b>   | <b>0.62-0.98</b> | <b>0.66</b> | <b>0.48-0.91</b> | <b>0.69</b>                | <b>0.56-0.86</b> |  |
|                                  | high   | >1515        | 0.96         | 0.77-1.19        | <b>0.63</b> | <b>0.47-0.85</b> | 0.79                  | 0.61-1.01 | <b>0.56</b>   | <b>0.44-0.71</b> | 0.86                    | 0.66-1.11 | <b>0.56</b>      | <b>0.43-0.74</b> | <b>0.71</b>   | <b>0.56-0.90</b> | <b>0.50</b> | <b>0.36-0.69</b> | <b>0.60</b>                | <b>0.48-0.74</b> |  |
| Total moderate PA (MET-min/week) | low    | <910         | 1.00         |                  | 1.00        |                  | 1.00                  |           | 1.00          |                  | 1.00                    |           | 1.00             |                  | 1.00          |                  | 1.00        |                  | 1.00                       |                  |  |
|                                  | medium | 910 to 2900  | 0.96         | 0.78-1.18        | 0.80        | 0.61-1.05        | 0.89                  | 0.70-1.13 | 0.85          | 0.68-1.06        | 0.93                    | 0.73-1.18 | 0.94             | 0.73-1.22        | 0.87          | 0.70-1.09        | <b>0.65</b> | <b>0.48-0.88</b> | <b>0.76</b>                | <b>0.62-0.93</b> |  |

|                                  |          |                |             |                  |             |                  |             |                  |             |                  |             |                  |             |                  |      |           |             |                  |             |                  |
|----------------------------------|----------|----------------|-------------|------------------|-------------|------------------|-------------|------------------|-------------|------------------|-------------|------------------|-------------|------------------|------|-----------|-------------|------------------|-------------|------------------|
|                                  | high     | >2900          | 0.99        | 0.79-1.23        | 0.82        | 0.62-1.08        | 0.91        | 0.71-1.16        | 0.79        | 0.63-1.00        | 1.10        | 0.86-1.41        | 1.06        | 0.81-1.39        | 0.96 | 0.76-1.21 | 0.88        | 0.65-1.21        | <b>0.67</b> | <b>0.55-0.83</b> |
| Total walking (MET-min/week)     | low      | <570           | 1.00        |                  | 1.00        |                  | 1.00        |                  | 1.00        |                  | 1.00        |                  | 1.00        |                  | 1.00 |           | 1.00        |                  | 1.00        |                  |
|                                  | medium   | 570 to 1800    | 1.01        | 0.82-1.24        | 0.93        | 0.71-1.22        | 1.19        | 0.94-1.51        | 0.97        | 0.77-1.21        | 1.08        | 0.85-1.37        | 0.96        | 0.75-1.24        | 1.12 | 0.90-1.40 | 1.04        | 0.77-1.42        | 1.05        | 0.86-1.28        |
|                                  | high     | >1800          | 0.93        | 0.75-1.16        | 0.78        | 0.59-1.04        | 0.97        | 0.75-1.24        | <b>0.72</b> | <b>0.57-0.91</b> | 1.11        | 0.86-1.43        | 0.86        | 0.66-1.13        | 0.86 | 0.68-1.09 | <b>0.71</b> | <b>0.52-0.99</b> | 0.94        | 0.76-1.17        |
| Total vigorous PA (MET-min/week) | low      | 0              | 1.00        |                  | 1.00        |                  | 1.00        |                  | 1.00        |                  | 1.00        |                  | 1.00        |                  | 1.00 |           | 1.00        |                  | 1.00        |                  |
|                                  | medium   | 1 to 960       | 0.84        | 0.67-1.06        | <b>0.50</b> | <b>0.36-0.70</b> | <b>0.70</b> | <b>0.53-0.91</b> | <b>0.68</b> | <b>0.53-0.87</b> | <b>0.68</b> | <b>0.52-0.88</b> | <b>0.73</b> | <b>0.55-0.97</b> | 0.80 | 0.63-1.02 | <b>0.47</b> | <b>0.33-0.68</b> | <b>0.71</b> | <b>0.57-0.89</b> |
|                                  | high     | >960           | 0.95        | 0.77-1.18        | <b>0.72</b> | <b>0.55-0.95</b> | <b>0.79</b> | <b>0.62-1.00</b> | <b>0.66</b> | <b>0.53-0.83</b> | 0.83        | 0.65-1.06        | 0.84        | 0.65-1.09        | 0.82 | 0.65-1.02 | <b>0.53</b> | <b>0.39-0.73</b> | <b>0.59</b> | <b>0.49-0.73</b> |
| Activity category                | low      |                | 1.00        |                  | 1.00        |                  | 1.00        |                  | 1.00        |                  | 1.00        |                  | 1.00        |                  | 1.00 |           | 1.00        |                  | 1.00        |                  |
|                                  | medium   |                | <b>0.67</b> | <b>0.49-0.92</b> | 0.81        | 0.55-1.21        | 1.16        | 0.80-1.69        | 0.81        | 0.58-1.13        | 0.81        | 0.56-1.18        | 0.77        | 0.52-1.15        | 0.93 | 0.66-1.31 | 0.74        | 0.47-1.16        | 0.93        | 0.67-1.28        |
|                                  | high     |                | <b>0.74</b> | <b>0.55-1.00</b> | <b>0.66</b> | <b>0.46-0.97</b> | 0.95        | 0.67-1.35        | <b>0.68</b> | <b>0.50-0.92</b> | 1.00        | 0.70-1.42        | 0.85        | 0.58-1.24        | 0.86 | 0.62-1.19 | <b>0.62</b> | <b>0.41-0.94</b> | <b>0.62</b> | <b>0.46-0.84</b> |
| Sitting (hours/day)              | low      | <4.58 h        | 1.00        |                  | 1.00        |                  | 1.00        |                  | 1.00        |                  | 1.00        |                  | 1.00        |                  | 1.00 |           | 1.00        |                  | 1.00        |                  |
|                                  | medium   | 4.58 to 6.86 h | 1.09        | 0.87-1.37        | 1.01        | 0.76-1.36        | <b>1.34</b> | <b>1.04-1.73</b> | 1.14        | 0.90-1.45        | 0.99        | 0.77-1.28        | 0.87        | 0.66-1.14        | 1.05 | 0.83-1.33 | 1.13        | 0.82-1.57        | <b>1.39</b> | <b>1.12-1.72</b> |
|                                  | high     | >6.86 h        | 1.14        | 0.90-1.43        | 1.14        | 0.85-1.54        | 1.29        | 1.00-1.68        | 1.25        | 0.98-1.59        | 0.91        | 0.70-1.19        | 0.89        | 0.67-1.18        | 1.18 | 0.93-1.51 | 1.03        | 0.73-1.45        | <b>1.59</b> | <b>1.28-1.98</b> |
| <b>Short PA questionnaire</b>    |          |                |             |                  |             |                  |             |                  |             |                  |             |                  |             |                  |      |           |             |                  |             |                  |
| Moderate PA (min/week)           | low      | <95            | 1.00        |                  | 1.00        |                  | 1.00        |                  | 1.00        |                  | 1.00        |                  | 1.00        |                  | 1.00 |           | 1.00        |                  | 1.00        |                  |
|                                  | medium   | 95 to 280      | 0.94        | 0.76-1.17        | 0.85        | 0.65-1.11        | 0.92        | 0.72-1.17        | 0.97        | 0.77-1.21        | 0.85        | 0.67-1.09        | 0.82        | 0.63-1.06        | 1.10 | 0.88-1.38 | 0.94        | 0.69-1.28        | 0.86        | 0.69-1.05        |
|                                  | high     | >280           | 0.85        | 0.69-1.06        | <b>0.65</b> | <b>0.49-0.86</b> | 0.85        | 0.67-1.08        | <b>0.70</b> | <b>0.55-0.88</b> | 0.85        | 0.66-1.09        | <b>0.61</b> | <b>0.47-0.80</b> | 0.81 | 0.65-1.02 | <b>0.67</b> | <b>0.49-0.92</b> | <b>0.60</b> | <b>0.48-0.74</b> |
| Vigorous PA (min/week)           | low      | 0              | 1.00        |                  | 1.00        |                  | 1.00        |                  | 1.00        |                  | 1.00        |                  | 1.00        |                  | 1.00 |           | 1.00        |                  | 1.00        |                  |
|                                  | medium   | 1 to 60        | 0.93        | 0.76-1.14        | 0.88        | 0.68-1.14        | 0.96        | 0.76-1.21        | 0.97        | 0.79-1.21        | 0.89        | 0.70-1.12        | 0.89        | 0.70-1.14        | 1.19 | 0.96-1.47 | 0.95        | 0.71-1.27        | <b>0.75</b> | <b>0.61-0.91</b> |
|                                  | high     | >60            | 1.11        | 0.89-1.39        | <b>0.66</b> | <b>0.48-0.90</b> | 1.01        | 0.79-1.29        | <b>0.75</b> | <b>0.58-0.95</b> | 0.89        | 0.69-1.14        | <b>0.65</b> | <b>0.49-0.87</b> | 1.22 | 0.96-1.54 | <b>0.59</b> | <b>0.41-0.84</b> | <b>0.68</b> | <b>0.55-0.85</b> |
| Activity category                | inactive | <150           | 1.00        |                  | 1.00        |                  | 1.00        |                  | 1.00        |                  | 1.00        |                  | 1.00        |                  | 1.00 |           | 1.00        |                  | 1.00        |                  |
|                                  | active   | ≥150           | 0.87        | 0.73-1.04        | <b>0.75</b> | <b>0.60-0.94</b> | <b>0.81</b> | <b>0.67-0.99</b> | <b>0.76</b> | <b>0.63-0.91</b> | 0.85        | 0.69-1.04        | <b>0.63</b> | <b>0.50-0.78</b> | 0.85 | 0.71-1.03 | <b>0.68</b> | <b>0.53-0.89</b> | <b>0.66</b> | <b>0.55-0.78</b> |

|                                                     |      |      |      |               |             |                       |      |           |             |                       |      |               |             |                       |      |               |             |                       |             |                       |
|-----------------------------------------------------|------|------|------|---------------|-------------|-----------------------|------|-----------|-------------|-----------------------|------|---------------|-------------|-----------------------|------|---------------|-------------|-----------------------|-------------|-----------------------|
| Activity category<br>(MET-min/week<br>dichotomized) | low  | <910 | 1.00 |               | 1.00        |                       | 1.00 |           | 1.00        |                       | 1.00 |               | 1.00        |                       | 1.00 |               | 1.00        |                       | 1.00        |                       |
|                                                     | high | ≥910 | 0.95 | 0.80-<br>1.13 | <b>0.69</b> | <b>0.55-<br/>0.87</b> | 1.02 | 0.84-1.24 | <b>0.73</b> | <b>0.61-<br/>0.88</b> | 0.89 | 0.73-<br>1.09 | <b>0.62</b> | <b>0.50-<br/>0.76</b> | 1.00 | 0.83-<br>1.19 | <b>0.70</b> | <b>0.54-<br/>0.91</b> | <b>0.68</b> | <b>0.58-<br/>0.81</b> |

Note: significant results are in bold

Abbreviations: BMI, body mass index; CI, confidence intervals; IPAQ, International Physical Activity Questionnaire; MET, metabolic equivalent; min, minutes; OR, odds ratio; PA, physical activity; WC, waist circumference; WHR, waist-to-hip ratio; WHtR, waist-to-height ratio
