# Supplementary material for: Associations between domains of physical activity, sitting time, and different measures of overweight and obesity
Source: PubMed Central journal article supplement — Prev Med Rep. 2016 Jan 29;3:177–84. doi: 10.1016/j.pmedr.2016.01.007 (PMC4929209; doi:10.1016/j.pmedr.2016.01.007), 2016-01-29
Supplement: mmc4.pdf [file mmc4.pdf]

**Supplementary Material Table 4.** Drop out analysis (N=3042 in sample)

|                                                        | SAPALDIA 1 (1991)<br>N=9651 |               | SAPALDIA 2 (2002/03)<br>N=8047 |                 | SAPALDIA 3 (2010/11)<br>N=5921 |                 |
|--------------------------------------------------------|-----------------------------|---------------|--------------------------------|-----------------|--------------------------------|-----------------|
|                                                        | in sample                   | not in sample | in sample                      | not in sample   | in sample                      | not in sample   |
| Age, years (SD)                                        | 40.1 (10.9)                 | 41.5 (12.0)   | 51.0 (10.9)                    | 52.7 (11.9)     | 59.3 (10.8)                    | 60.1 (11.8)     |
| Sex (%)                                                |                             |               |                                |                 |                                |                 |
| men                                                    | 47.3                        | 50.0          | 47.2                           | 48.6            | 47.3                           | 47.8            |
| women                                                  | 52.7                        | 50.0          | 52.8                           | 51.4            | 52.7                           | 52.2            |
| Language region (%)                                    |                             |               |                                |                 |                                |                 |
| German                                                 | 57.9                        | 49.8          | 57.7                           | 50.8            | 57.7                           | 52.2            |
| French                                                 | 32.3                        | 34.9          | 32.3                           | 32.4            | 32.3                           | 32.5            |
| Italian                                                | 9.9                         | 15.3          | 10.0                           | 16.8            | 10.0                           | 15.3            |
| Education                                              |                             |               |                                |                 |                                |                 |
| lower than tertiary                                    | 80.3                        | 84.7          | 71.5                           | 77.7            | 69.0                           | 75.4            |
| tertiary education                                     | 19.7                        | 15.3          | 28.5                           | 22.3            | 31.0                           | 24.6            |
| Smoking status (%)                                     |                             |               |                                |                 |                                |                 |
| current non-smoker                                     | 73.0                        | 63.5          | 78.5                           | 70.8            | 84.6                           | 78.7            |
| current smoker                                         | 27.0                        | 36.5          | 21.5                           | 29.2            | 15.4                           | 21.3            |
| BMI, kg/m <sup>2</sup> (SD)                            | 23.4 (3.5)                  | 24.2 (4.0)    | 25.5 (4.3)                     | 26.2 (4.6)      | 26.1 (4.6)                     | 26.8 (4.5)      |
| PA according to short questionnaire, MET-min/week (SD) | na                          | na            | 1207.6 (1150.1)                | 1108.3 (1190.5) | 1237.3 (1172.2)                | 1133.9 (1211.6) |
