# Supplementary material for: Associations between domains of physical activity, sitting time, and different measures of overweight and obesity
Source: PubMed Central journal article supplement — Prev Med Rep. 2016 Jan 29;3:177–84. doi: 10.1016/j.pmedr.2016.01.007 (PMC4929209; doi:10.1016/j.pmedr.2016.01.007), 2016-01-29
Supplement: mmc5.pdf [file mmc5.pdf]

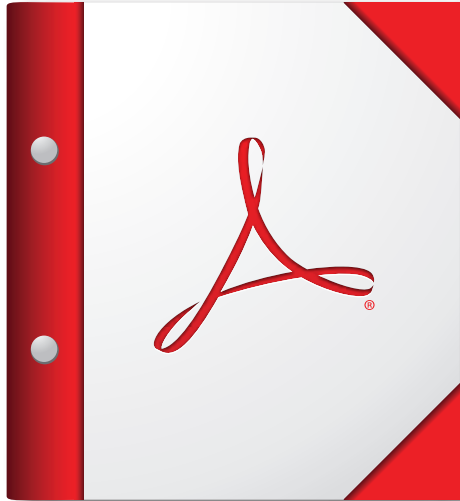

**For the best experience, open this PDF portfolio in  
Acrobat 9 or Adobe Reader 9, or later.**

[Get Adobe Reader Now!](#)
